# Supplementary material for: Drop formation using ferrofluids driven magnetically in a step emulsification device
Source: Royal Society of Chemistry journal article supplement (doi:10.1039/c6lc00645k), 2016-01-01
Supplement: c6lc00645k1.pdf [file c6lc00645k1.pdf]

## **Electronic Supplementary Information**

### **drop formation using ferrofluids driven magnetically in a step emulsification device**

Soroush Kahkeshani<sup>a</sup> and Dino Di Carlo<sup>a</sup>

a)Department of Bioengineering, California NanoSystems  
Institute, University of California, Los Angeles, CA, 90024, USA

Corresponding author: [dicarlo@seas.ucla.edu](mailto:dicarlo@seas.ucla.edu)

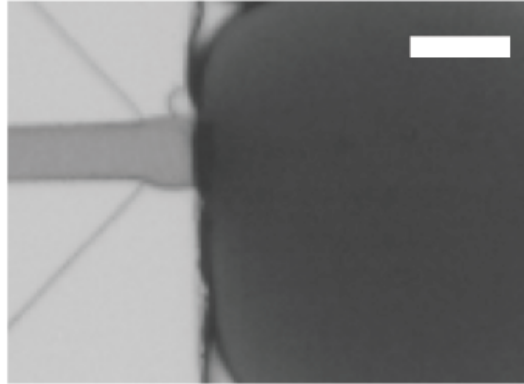

Fig. 1: High flow rate leads to jetting and no drop formation in the step junction. A test with a syringe pump at  $2\mu\text{l}/\text{min}$  (no magnet- Capillary number  $>0.1$ . Scale bar is  $80\ \mu\text{m}$ )

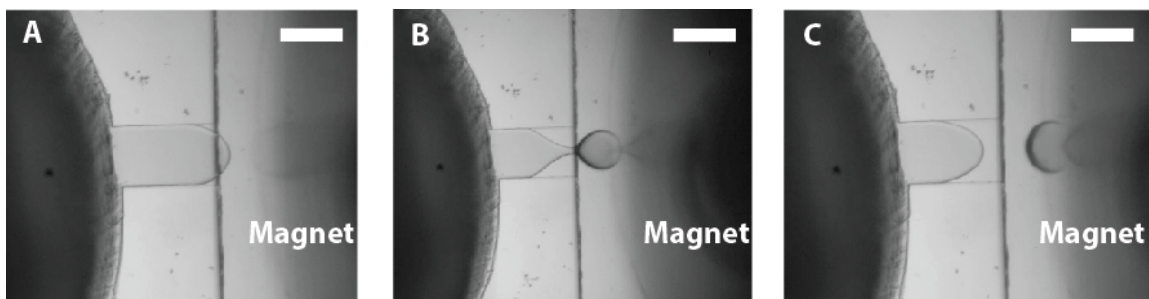

Fig. 2: Droplet generation without the terrace region. (Pinch-off of the drop occurs within the channel adjoining the reservoir. Scale bar is  $150\ \mu\text{m}$ ). A: 0, B: 35 ms, C: 60 ms.

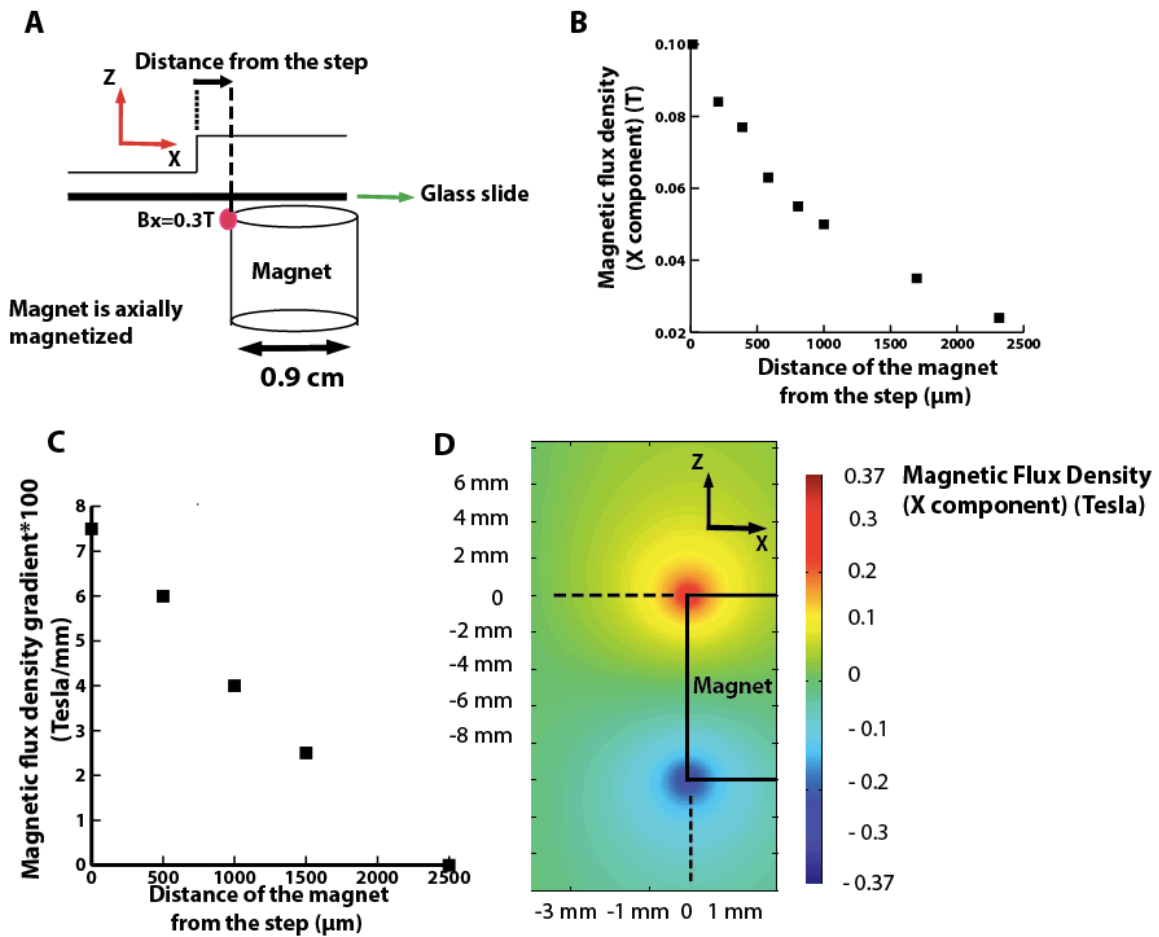

Fig. 3: Magnet location and characterization of the magnetic flux density based on 2D COMSOL simulation. Magnet corner (top left) is located at (0, 0). A) Magnet location and size. B) Magnetic flux density in X direction and C) Magnetic flux density gradient in the X direction that are calculated based on D) COMSOL simulation.
